# Supplementary material for: Evolutionary design of machine-learning-predicted bulk metallic glasses
Source: Royal Society of Chemistry journal article supplement (doi:10.1039/d2dd00078d), 2023-01-01
Supplement: d2dd00078d1.pdf [file d2dd00078d1.pdf]

Supplementary Material

**Evolutionary design of machine-learning-predicted bulk metallic glasses**

Robert M. Forrest, A. Lindsay Greer

S1 Elemental cost data

Table S1 Cost-per-kilogramme for each element, from multiple sources reporting on different years of market activity. <sup>S1-S4</sup>

| Element | Price (\$/kg) | Element | Price (\$/kg) | Element | Price (\$/kg) |
|---------|---------------|---------|---------------|---------|---------------|
| H       | 1.39          | Nb      | 85.6          | Tl      | 4200          |
| He      | 24            | Mo      | 40.1          | Pb      | 2             |
| Li      | 85.6          | Tc      | 1e5           | Bi      | 6.36          |
| Be      | 857           | Ru      | 1.06e4        | Po      | 4.92e13       |
| B       | 3.68          | Rh      | 1.47e5        | At      | None          |
| C       | 0.122         | Pd      | 4.95e4        | Rn      | None          |
| N       | 0.14          | Ag      | 521           | Fr      | None          |
| O       | 0.154         | Cd      | 2.73          | Ra      | None          |
| F       | 2.16          | In      | 167           | Ac      | 2.9e13        |
| Ne      | 240           | Sn      | 18.7          | Th      | 287           |
| Na      | 3.43          | Sb      | 5.79          | Pa      | 2.8e5         |
| Mg      | 2.32          | Te      | 63.5          | U       | 101           |
| Al      | 1.79          | I       | 35            | Np      | 6.6e5         |
| Si      | 1.7           | Xe      | 1800          | Pu      | 6.49e6        |
| P       | 2.69          | Cs      | 6.18e4        | Am      | 7.5e5         |
| S       | 0.0926        | Ba      | 0.275         | Cm      | 1.6e11        |
| Cl      | 0.082         | La      | 4.92          | Bk      | 1.85e11       |
| Ar      | 0.931         | Ce      | 4.71          | Cf      | 1.85e11       |
| K       | 13.6          | Pr      | 103           | Es      | None          |
| Ca      | 2.35          | Nd      | 57.5          | Fm      | None          |
| Sc      | 3460          | Pm      | 4.6e5         | Md      | None          |
| Ti      | 11.7          | Sm      | 13.9          | No      | None          |
| V       | 385           | Eu      | 31.4          | Lr      | None          |
| Cr      | 9.4           | Gd      | 28.6          | Rf      | None          |
| Mn      | 1.82          | Tb      | 658           | Db      | None          |
| Fe      | 0.424         | Dy      | 307           | Sg      | None          |
| Co      | 32.8          | Ho      | 57.1          | Bh      | None          |
| Ni      | 13.9          | Er      | 26.4          | Hs      | None          |
| Cu      | 6             | Tm      | 3000          | Mt      | None          |
| Zn      | 2.55          | Yb      | 17.1          | Ds      | None          |
| Ga      | 148           | Lu      | 643           | Rg      | None          |
| Ge      | 1010          | Hf      | 900           | Cn      | None          |
| As      | 1.31          | Ta      | 312           | Nh      | None          |
| Se      | 21.4          | W       | 35.3          | Fl      | None          |
| Br      | 4.39          | Re      | 4150          | Mc      | None          |
| Kr      | 290           | Os      | 1.2e4         | Lv      | None          |
| Rb      | 1.55e4        | Ir      | 5.62e4        | Ts      | None          |
| Sr      | 6.68          | Pt      | 2.78e4        |         |               |
| Y       | 31            | Hg      | 30.2          |         |               |

## References

- S1 R. K. Zinke and W. H. Werkheiser, *Mineral Commodity Summaries*, United States Geological Survey technical report, 2018.
- S2 *CEIC Data*, <https://www.ceicdata.com/>.
- S3 U.S. Energy Information Administration, *Coal Prices and Outlook*, <https://www.eia.gov/energyexplained/coal/prices-and-outlook.php>.
- S4 *Shanghai Metals Market*, [metal.com](http://metal.com).
